# Supplementary material
Source: MDPI journal article supplement (https://www.mdpi.com/1099-4300/24/10/1398)
Supplement: s1 [file s1]

# Information Theory for Biological Sequence Classification: A Novel Feature Extraction Technique based on Tsallis Entropy

Robson P. Bonidia <sup>1</sup>, Anderson P. Avila Santos <sup>1,3</sup>, Breno L. S. de Almeida <sup>1</sup>, Peter F. Stadler <sup>4</sup>, Ulisses N. da Rocha <sup>3</sup>, Danilo S. Sanches <sup>2</sup>, and André C.P.L.F. de Carvalho <sup>1</sup>

<sup>1</sup> Institute of Mathematics and Computer Sciences, University of São Paulo, São Carlos 13566-590, Brazil

<sup>2</sup> Department of Computer Science, Federal University of Technology - Paraná, UTFPR, Cornélio Procópio 86300-000, Brazil

<sup>3</sup> Department of Environmental Microbiology, Helmholtz Centre for Environmental Research – UFZ GmbH, Leipzig, Saxony, Germany

<sup>4</sup> Department of Computer Science and Interdisciplinary Center of Bioinformatics, University of Leipzig, Leipzig, Saxony, Germany

## Supplementary File: S1

Table S1: Overview of Selected Studies

| ID  | Title                                                                                                                                                                       | Journal                 | Year |
|-----|-----------------------------------------------------------------------------------------------------------------------------------------------------------------------------|-------------------------|------|
| S1  | PROFEAT: a web server for computing structural and physicochemical features of proteins and peptides from amino acid sequence                                               | Nucleic Acids Research  | 2006 |
| S2  | PseAAC: a flexible web server for generating various kinds of protein pseudo amino acid composition                                                                         | Analytical biochemistry | 2008 |
| S3  | Update of PROFEAT: a web server for computing structural and physicochemical features of proteins and peptides from amino acid sequence                                     | Nucleic Acids Research  | 2011 |
| S4  | propy: a tool to generate various modes of Chou's PseAAC                                                                                                                    | Bioinformatics          | 2013 |
| S5  | PseKNC-General: a cross-platform package for generating various modes of pseudo nucleotide compositions                                                                     | Bioinformatics          | 2014 |
| S6  | PseKNC: A flexible web server for generating pseudo K-tuple nucleotide composition                                                                                          | Analytical Biochemistry | 2014 |
| S7  | SPiCE: a web-based tool for sequence-based protein classification and exploration                                                                                           | BMC bioinformatics      | 2014 |
| S8  | protr/ProtrWeb: R package and web server for generating various numerical representation schemes of protein sequences                                                       | Bioinformatics          | 2015 |
| S9  | ProFET: Feature engineering captures high-level protein functions                                                                                                           | Bioinformatics          | 2015 |
| S10 | Pse-in-One: a web server for generating various modes of pseudo components of DNA, RNA, and protein sequences                                                               | Nucleic Acids Research  | 2015 |
| S11 | repDNA: a Python package to generate various modes of feature vectors for DNA sequences by incorporating user-defined physicochemical properties and sequence-order effects | Bioinformatics          | 2015 |
| S12 | Rcpi: R/Bioconductor package to generate various descriptors of proteins, compounds and their interactions                                                                  | Bioinformatics          | 2015 |

|     |                                                                                                                                                               |                                  |      |
|-----|---------------------------------------------------------------------------------------------------------------------------------------------------------------|----------------------------------|------|
| S13 | DNAShapeR: an R/Bioconductor package for DNA shape prediction and feature encoding                                                                            | Bioinformatics                   | 2015 |
| S14 | repRNA: a web server for generating various feature vectors of RNA sequences                                                                                  | Mol Genet Genomics               | 2016 |
| S15 | Pse-in-One 2.0: an improved package of web servers for generating various modes of pseudo components of DNA, RNA, and protein sequences                       | Natural Science                  | 2017 |
| S16 | POSSUM: a bioinformatics toolkit for generating numerical sequence feature descriptors based on PSSM profiles                                                 | Bioinformatics                   | 2017 |
| S17 | BioSeq-Analysis: a platform for DNA, RNA and protein sequence analysis based on machine learning approaches                                                   | Briefings in Bioinformatics      | 2017 |
| S18 | iFeature: a Python package and web server for features extraction and selection from protein and peptide sequences                                            | Bioinformatics                   | 2018 |
| S19 | PROSES: A Web Server for Sequence-Based Protein Encoding                                                                                                      | Journal of Comput. Biology       | 2018 |
| S20 | PyBioMed: a python library for various molecular representations of chemicals, proteins and DNAs and their interactions                                       | Journal of Cheminformatics       | 2018 |
| S21 | PyFeat: a Python-based effective feature generation tool for DNA, RNA and protein sequences                                                                   | Bioinformatics                   | 2019 |
| S22 | BioSeq-Analysis2.0: an updated platform for analyzing DNA, RNA and protein sequences at sequence level and residue level based on machine learning approaches | Nucleic Acids Research           | 2019 |
| S23 | Seq2Feature: a comprehensive web-based feature extraction tool                                                                                                | Bioinformatics                   | 2019 |
| S24 | iLearn: an integrated platform and meta-learner for feature engineering, machine-learning analysis and modeling of DNA, RNA and protein sequence data         | Briefings in Bioinformatics      | 2019 |
| S25 | Physicochemical n-Grams Tool: A tool for protein physicochemical descriptor generation via Chou's 5-step rule                                                 | Chemical Biology and Drug Design | 2020 |

## Supplementary File: S2

Table S2: Descriptor Group

| Group                                 | Initials | Application Group |
|---------------------------------------|----------|-------------------|
| Amino Acid Composition                | AAC      | Protein           |
| Pseudo-Amino Acid Composition         | PseAAC   | Protein           |
| Composition, Transition, Distribution | CTD      | Protein           |
| Sequence-Order                        | SO       | Protein           |
| Topological Descriptors               | TD       | Protein           |
| Conjoint Triad                        | CT       | Protein           |
| Proteochemometric Descriptors         | PCM      | Protein           |
| Profile-based Features                | PF       | Protein           |
| Nucleic Acid Composition              | NAC      | DNA, RNA          |
| Pseudo Nucleic Acid Composition       | PseNAC   | DNA, RNA          |
| Structure Composition                 | SC       | DNA, RNA, Protein |
| Sequence Similarity                   | SS       | DNA, RNA, Protein |
| Autocorrelation                       | AC       | DNA, RNA, Protein |
| Numerical Mapping                     | NM       | DNA, RNA, Protein |
| K-Nearest Neighbor                    | KNN      | DNA, RNA, Protein |
| Physicochemical Property              | PP       | DNA, RNA, Protein |

## Supplementary File: S3

- **Group:** This column classifies the feature descriptor in each group shown in Supplementary File: S2;
- **Descriptor:** Feature descriptors found in each study and classified in their respective group;
- **Dimension:** Number of features generated by the descriptor (columns). This column is based on the information contained in the revised studies. The "—" symbol means that the dimension may vary according to the chosen parameter, or there is no such information in the studies.
- **Study:** Which study provides the descriptor.

Table S3: Feature Descriptors Found in All Studies

| Group  | Descriptor                                   | Dimension               | Study                                  |
|--------|----------------------------------------------|-------------------------|----------------------------------------|
| NAC    | Nucleotide composition                       | 4                       | S5, S22, S24                           |
|        | Dinucleotide composition                     | 16                      | S5, S22, S24                           |
|        | Trinucleotide composition                    | 64                      | S5, S22, S24                           |
|        | Tetranucleotide composition                  | 256                     | S5                                     |
|        | Pentanucleotide composition                  | 1024                    | S5                                     |
|        | Hexanucleotide composition                   | 4096                    | S5                                     |
|        | Basic kmer                                   | $4^k$                   | S10, S11, S13, S15, S17, S20, S22, S24 |
|        | Reverse complementary kmer                   | -                       | S10, S11, S15, S17, S20, S22, S24      |
|        | Increment of diversity                       | $2k$                    | S11, S15, S17, S22                     |
|        | Mismatch                                     | -                       | S15, S17, S22                          |
|        | Subsequence                                  | -                       | S15, S17, S22                          |
|        | GC-content                                   | 1                       | S21                                    |
|        | AT/GT Ratio                                  | 1                       | S21                                    |
|        | Cumulative skew                              | 2                       | S21                                    |
|        | kGap                                         | -                       | S21                                    |
|        | Position-specific nucleotide frequency       | -                       | S22, S24                               |
|        | Nucleotide Content                           | 7                       | S23                                    |
|        | Conformational properties                    | 18                      | S23                                    |
|        | Enhanced nucleic acid composition            | 18                      | S24                                    |
|        | Composition of k-spaced Nucleic Acid Pairs   | -                       | S22, S24                               |
| AC     | Normalized Moreau–Broto                      | 240                     | S5, S15, S17, S22                      |
|        | Moran                                        | 240                     | S5, S15, S17, S22                      |
|        | Geary                                        | 240                     | S5, S15, S17, S22                      |
|        | Dinucleotide-based auto covariance           | $N \cdot LAG$           | S10, S11, S15, S17, S20, S22, S24      |
|        | Dinucleotide-based cross covariance          | $N(N - 1) \cdot LAG$    | S10, S11, S15, S17, S20, S22, S24      |
|        | Dinucleotide-based auto-cross covariance     | $N^2 \cdot LAG$         | S10, S11, S15, S17, S20, S22, S24      |
|        | Trinucleotide-based auto covariance          | $N \cdot LAG$           | S10, S11, S15, S17, S20, S22, S24      |
|        | Trinucleotide-based cross covariance         | $N(N - 1) \cdot LAG$    | S10, S11, S15, S17, S20, S22, S24      |
|        | Trinucleotide-based auto-cross covariance    | $N^2 \cdot LAG$         | S10, S11, S15, S17, S20, S22, S24      |
|        |                                              |                         |                                        |
| PseNAC | Type 1 Pseudo k-tuple nucleotide composition | $4^k + \lambda$         | S5, S6                                 |
|        | Type 2 Pseudo k-tuple nucleotide composition | $4^k + \lambda \cdot N$ | S5, S6                                 |
|        | Pseudo k-tuple nucleotide composition        | $4^k + \lambda$         | S10, S11, S15, S17, S20, S22, S24      |

|     |                                                               |                        |                                                  |
|-----|---------------------------------------------------------------|------------------------|--------------------------------------------------|
|     | Pseudo dinucleotide composition                               | $16 + \lambda$         | S10, S11, S15, S17, S20, S22, S24                |
|     | General parallel correlation pseudo dinucleotide composition  | $16 + \lambda$         | S10, S11, S15, S17, S20, S22, S24                |
|     | General parallel correlation pseudo trinucleotide composition | $64 + \lambda$         | S10, S11, S15, S17, S20, S22, S24                |
|     | General series correlation pseudo dinucleotide composition    | $16 + \lambda \cdot N$ | S10, S11, S15, S17, S20, S22, S24                |
|     | General series correlation pseudo trinucleotide composition   | $64 + \lambda \cdot N$ | S10, S11, S15, S17, S20, S22, S24                |
| SC  | DNA shape features                                            | -                      | S13                                              |
| NM  | Z-curve theory                                                | -                      | S21, S22                                         |
|     | Nucleotide Chemical Property                                  | -                      | S22, S24                                         |
|     | Accumulated Nucleotide Frequency                              | -                      | S22, S24                                         |
|     | Electron-ion interaction pseudopotential                      | -                      | S22, S24                                         |
|     | Pseudo electron-ion interaction pseudopotential               | -                      | S22, S24                                         |
|     | Binary                                                        | -                      | S22, S24                                         |
| PP  | Dinucleotide physicochemical                                  | -                      | S22, S23                                         |
|     | Trinucleotide physicochemical                                 | -                      | S22                                              |
| SS  | BLAST-matrix                                                  | -                      | S22                                              |
| AAC | Amino acid composition                                        | 20                     | S1, S3, S7, S8, S9, S12, S18, S19, S20, S22, S24 |
|     | Dipeptide composition                                         | 400                    | S1, S3, S7, S8, S9, S12, S18, S19, S20           |
|     | Tripeptide composition                                        | 8000                   | S4, S8, S12, S18, S20, S22, S24                  |
|     | Terminal end amino acid count                                 | 20                     | S7                                               |
|     | Amino acid pair                                               | 400                    | S19                                              |
|     | Secondary structure composition                               | 3                      | S7                                               |
|     | Secondary structure - amino acid composition                  | 60                     | S7                                               |
|     | Solvent accessibility composition                             | 2                      | S7                                               |
|     | Solvent accessibility - amino acid composition                | 40                     | S7                                               |
|     | Codon composition                                             | 64                     | S7                                               |
|     | Protein length                                                | 1                      | S7                                               |
|     | Overlapping K-mers                                            | -                      | S9                                               |
|     | Information-based statistics                                  | -                      | S9                                               |
|     | Basic kmer                                                    | $20^k$                 | S10, S15, S17, S22                               |
|     | Distance-based residue                                        | -                      | S15, S17, S22                                    |
|     | Distance pair                                                 | -                      | S15, S17, S22                                    |
|     | Residue-Couple Model                                          | -                      | S19                                              |
|     | Composition moment vector                                     | -                      | S19                                              |
|     | Enhanced amino acid composition                               | -                      | S18, S24                                         |
|     | Composition of k-spaced amino acid pairs                      | 2400                   | S18, S22, S24                                    |
|     | Dipeptide deviation from expected mean                        | 400                    | S18                                              |
|     | Grouped amino acid composition                                | 5                      | S18, S22, S24                                    |
|     | Enhanced grouped amino acid composition                       | -                      | S18, S24                                         |
|     | Composition of k-spaced amino acid group pairs                | 150                    | S18, S22, S24                                    |
|     | Grouped dipeptide composition                                 | 25                     | S18                                              |
|     | Grouped tripeptide composition                                | 125                    | S18, S22, S24                                    |
|     | kGap                                                          | -                      | S21                                              |
|     | Position-specific nucleotide frequency                        | -                      | S22                                              |

|        |                                                 |                        |                                                            |
|--------|-------------------------------------------------|------------------------|------------------------------------------------------------|
| PseAAC | Type 1 PseAAC                                   | $20 + \lambda$         | S2, S3, S4, S7, S8, S10, S12, S15, S17, S18, S20, S22, S24 |
|        | Type 2 PseAAC                                   | $20 + \lambda \cdot N$ | S2, S3, S4, S7, S8, S10, S12, S15, S17, S18, S20, S22, S24 |
|        | Dipeptide (or Type 3) PseAAC                    | 420                    | S2                                                         |
|        | General parallel correlation PseAAC             | $20 + \lambda$         | S10, S15, S17, S22                                         |
|        | General series correlation PseAAC               | $20 + \lambda \cdot N$ | S10, S15, S17, S22                                         |
|        | Pseudo K-tuple reduced AAC (type1 to type16)    | -                      | S18, S24                                                   |
| AC     | Normalized Moreau–Broto                         | 240                    | S1, S3, S4, S7, S8, S12, S18, S20, S22, S24                |
|        | Moran                                           | 240                    | S1, S3, S4, S7, S8, S12, S18, S20, S22, S24                |
|        | Geary                                           | 240                    | S1, S3, S4, S7, S8, S12, S18, S20, S22, S24                |
|        | Auto covariance                                 | -                      | S10, S15, S17, S22                                         |
|        | Cross covariance                                | -                      | S10, S15, S17, S22                                         |
|        | Auto-cross covariance                           | -                      | S10, S15, S17, S22                                         |
| CTD    | Composition                                     | 21                     | S1, S3, S4, S7, S8, S9, S12, S18, S19, S20, S22, S24       |
|        | Transition                                      | 21                     | S1, S3, S4, S7, S8, S9, S12, S18, S19, S20, S22, S24       |
|        | Distribution                                    | 105                    | S1, S3, S4, S7, S8, S9, S12, S18, S19, S20, S22, S24       |
| SO     | Sequence-order-coupling number                  | 60                     | S1, S3, S4, S8, S12, S18, S20, S22, S24                    |
|        | Quasi-sequence-order                            | 100                    | S1, S3, S4, S7, S8, S12, S18, S20, S22, S24                |
| TD     | Topological descriptors                         | 405                    | S3                                                         |
| PF     | Signal average                                  | -                      | S7                                                         |
|        | Signal peaks area                               | -                      | S7                                                         |
|        | PSSM (Position-Specific Scoring Matrix) profile | -                      | S8, S12, S15, S16, S17, S18, S22, S24                      |
|        | Profile-based Physicochemical distance          | -                      | S15, S17, S22                                              |
|        | Distance-based Top-n-gram                       | -                      | S15, S17, S22                                              |
|        | Top-n-gram                                      | -                      | S15, S17, S22                                              |
|        | Sequence conservation score                     | -                      | S17, S22                                                   |
|        | Frequency profiles matrix                       | -                      | S22                                                        |
| CT     | Conjoint Triad                                  | 343                    | S8, S12, S18, S19, S20, S22, S24                           |
|        | Conjoint k-spaced triad                         | $343 \cdot (k + 1)$    | S18, S24                                                   |
| PCM    | Principal components analysis                   | 175                    | S8, S12                                                    |
|        | Principal components analysis (2D and 3D)       | 4025                   | S8                                                         |
|        | Factor analysis                                 | 175                    | S8, S12                                                    |
|        | Factor analysis (2D and 3D)                     | 4025                   | S8                                                         |
|        | Multidimensional scaling                        | 175                    | S8, S12                                                    |
|        | Multidimensional scaling (2D and 3D)            | 4025                   | S8                                                         |
|        | BLOSUM and PAM matrix-derived                   | 175                    | S8, S12, S18, S22, S24                                     |
|        | Biophysical quantitative properties             | -                      | S9                                                         |

|     |                                 |    |                    |
|-----|---------------------------------|----|--------------------|
|     | Amino acid properties           | -  | S12                |
|     | Molecular descriptors           | -  | S12                |
| SS  | Gene Ontology (GO) similarity   | -  | S12                |
|     | Sequence Alignment              | -  | S12                |
| SC  | Secondary structure             | -  | S17, S18, S22, S24 |
|     | Solvent accessible surface area | -  | S17, S18, S22, S24 |
|     | Secondary structure binary      | -  | S18, S22, S24      |
|     | Disorder                        | -  | S9, S18, S24       |
|     | Disorder content                | -  | S18, S24           |
|     | Disorder binary                 | -  | S18, S24           |
|     | Torsional angles                | -  | S18, S24           |
| NM  | Binary                          | -  | S18, S22, S24      |
|     | Orthonormal encoding            | -  | S19                |
|     | 6-dimension One-hot method      | -  | S22                |
| KNN | K-nearest neighbor for proteins | 60 | S18, S24           |
| PP  | AAindex                         | -  | S9, S18, S22, S24  |
|     | Z-scale                         | -  | S18, S22, S24      |
|     | Physicochemical n-Grams         | -  | S25                |
